# Supplementary material for: A 3D paddle-wheel type Cu(ii)-based MOF with pcu topology as an efficient photocatalyst for antibiotics photodegradation
Source: Royal Society of Chemistry journal article supplement (doi:10.1039/d3nj01644g), 2023-01-01
Supplement: d3nj01644g1.pdf [file d3nj01644g1.pdf]

## A 3D paddle-wheel type Cu(II)-based MOF with *pcu* topology as an efficient photocatalyst for antibiotics

### Materials and Method

All the reagents to perform synthesis were obtained from commercial sources and were used without further purification. Powder X-ray diffraction (PXRD) data were collected using Bruker ADVANCE X-ray diffractometer with Cu-K $\alpha$  radiation ( $\lambda=1.5418 \text{ \AA}$ ) at 50 kV, 20 mA with a scanning rate of  $6^\circ/\text{min}$  and a step size of  $0.02^\circ$ . Fourier transform infrared (FT-IR) spectra for both the MOFs as KBr discs were recorded on Nicolet Impact 750 FTIR in the range of  $400\text{-}4000 \text{ cm}^{-1}$ . Scanning electron microscopy (SEM) was carried out on a FEI Quanta 400 FEG field emission scanning electron microscope. Nitrogen adsorption-desorption measurements were performed at 77 K in a liquid nitrogen bath on a Micromeritics ASAP 3020 analyzer. Samples were degassed at  $150 \text{ }^\circ\text{C}$  for 10 h on degas vacuum system prior to analysis. The Brunauer-Emmett-Teller (BET) method was used to calculate the specific surface areas ( $S_{BET}$ ). The UV-vis absorbance and diffuse-reflectance spectra (UV-vis DRS) were characterized by USA PE Lambda 750 S.

### X-ray Crystallography

The single crystal X-ray diffraction data for the MOF **1** were collected on a Bruker SMART APEX diffractometer which was equipped with graphite monochromated MoK $\alpha$  radiation ( $\lambda = 0.71073 \text{ \AA}$ ) by using an  $\omega$ -scan technique. The structures were solved by direct method (SHLEXS-2014) and refined using the full-matrix least-square procedure based on  $F^2$  (Shelxl-2014). All the hydrogen atoms were generated geometrically and refined isotropically using a riding model. CCDC numbers: 2168426.

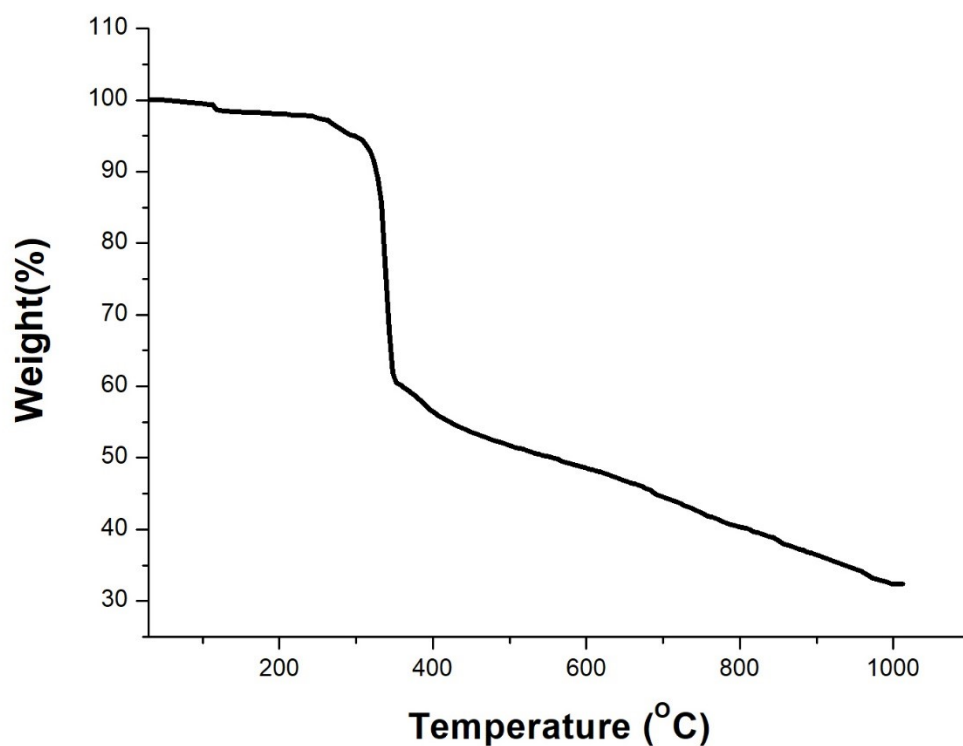

Fig. S1 The thermogravimetric plot for 1

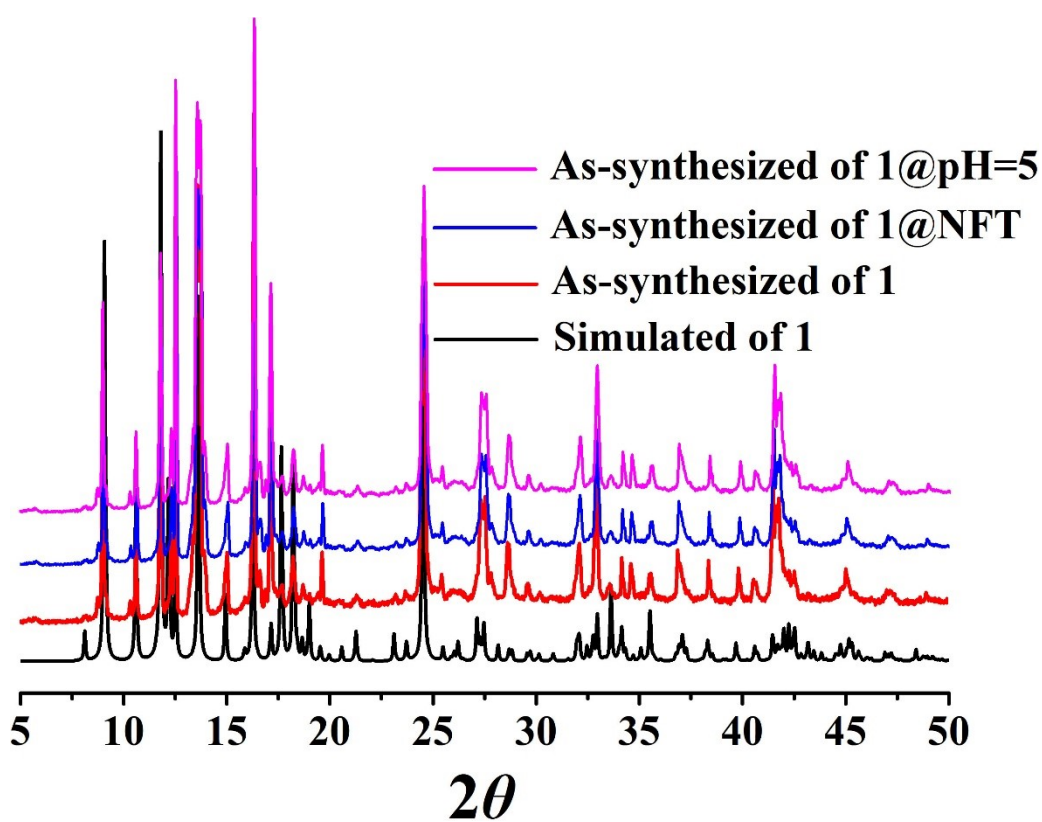

Fig. S2 Simulated, as-synthesized, 1/NFT and 1/pH =5 PXRD plots for 1.

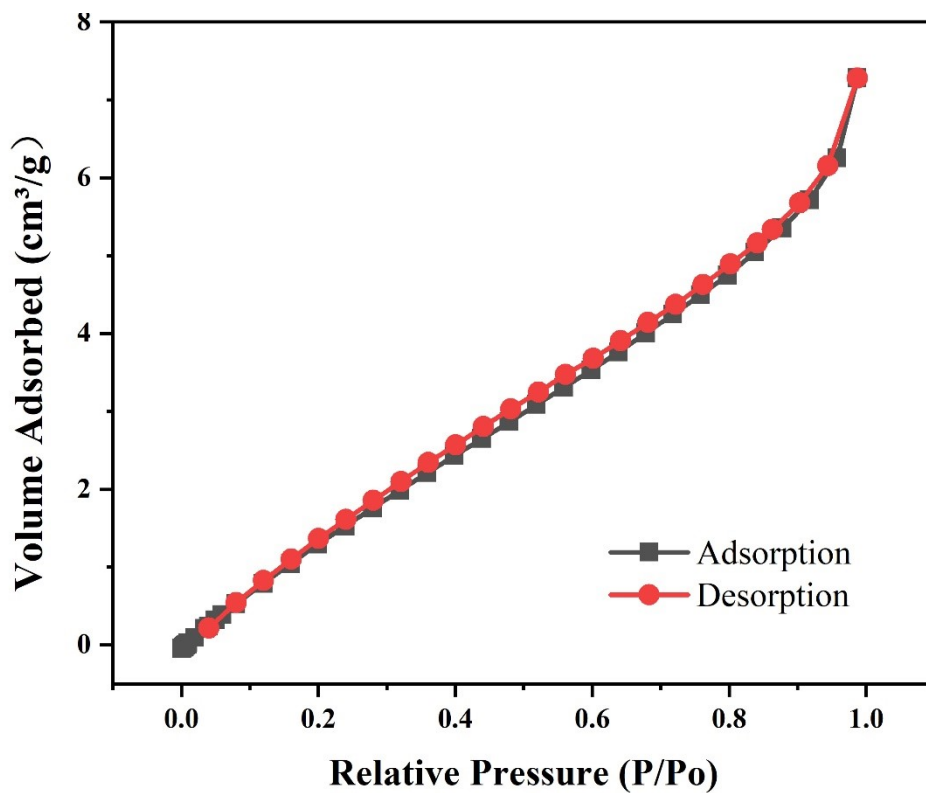

Fig. S3 sorption and desorption isotherms at 77 K for **1**.

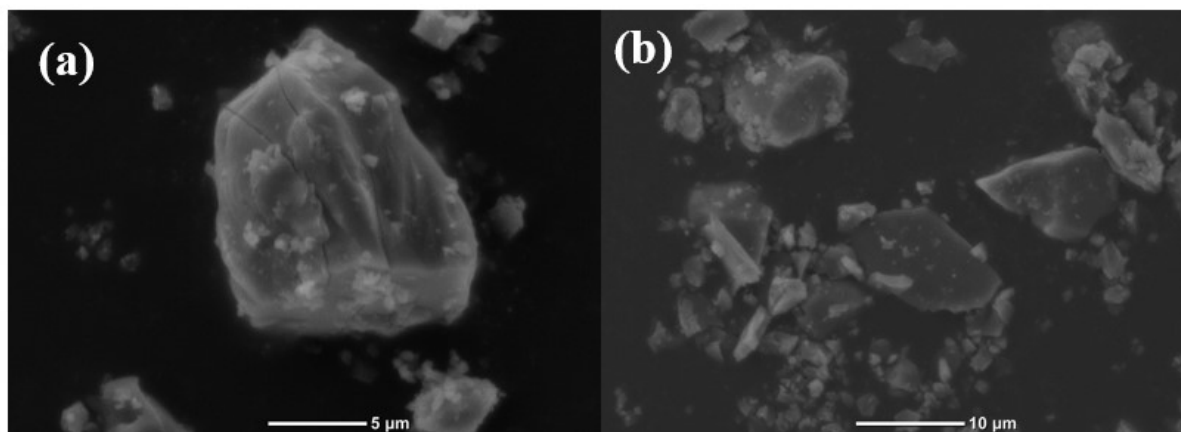

Fig. S4 view of the SEM before and after catalytic reaction.

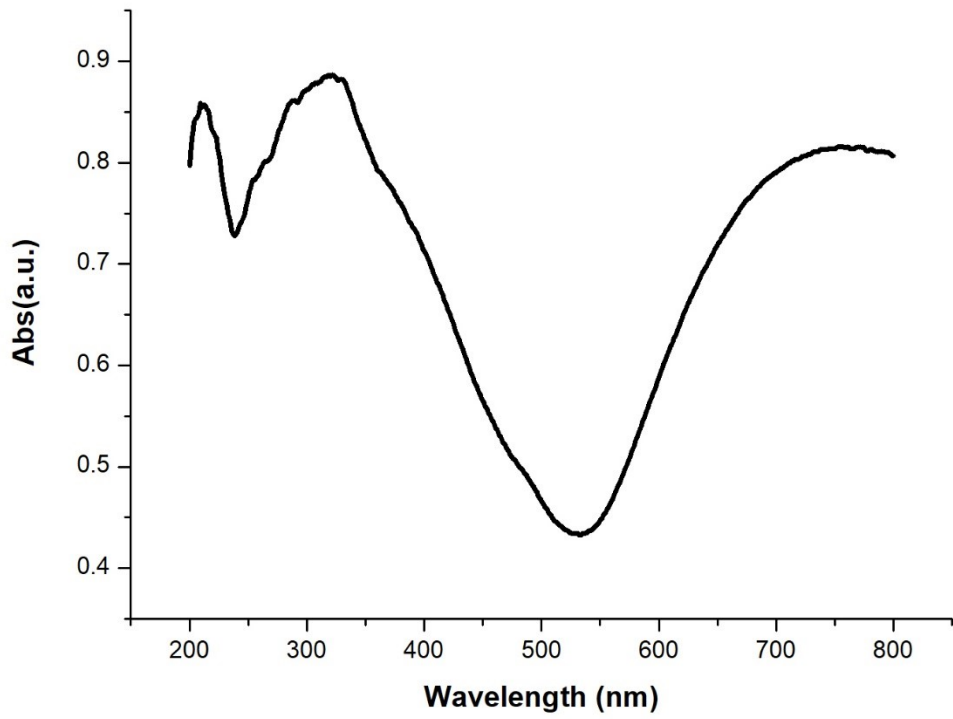

Fig. S5 UV-Vis spectrum for 1.

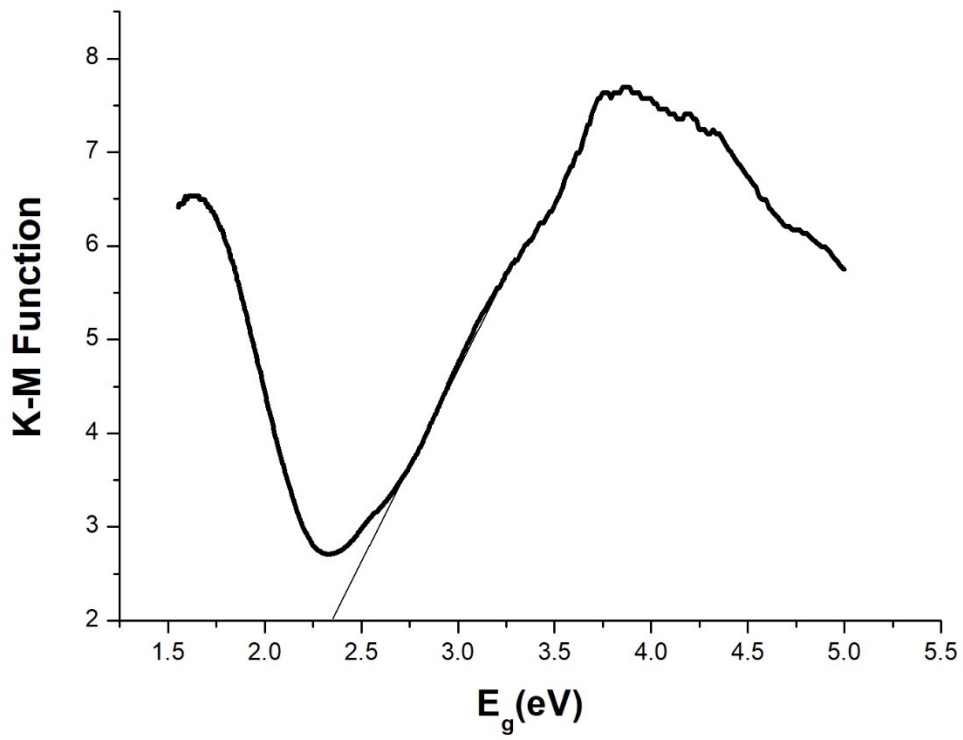

Fig. S6 K-M vs.  $E_g$  plot for 1.

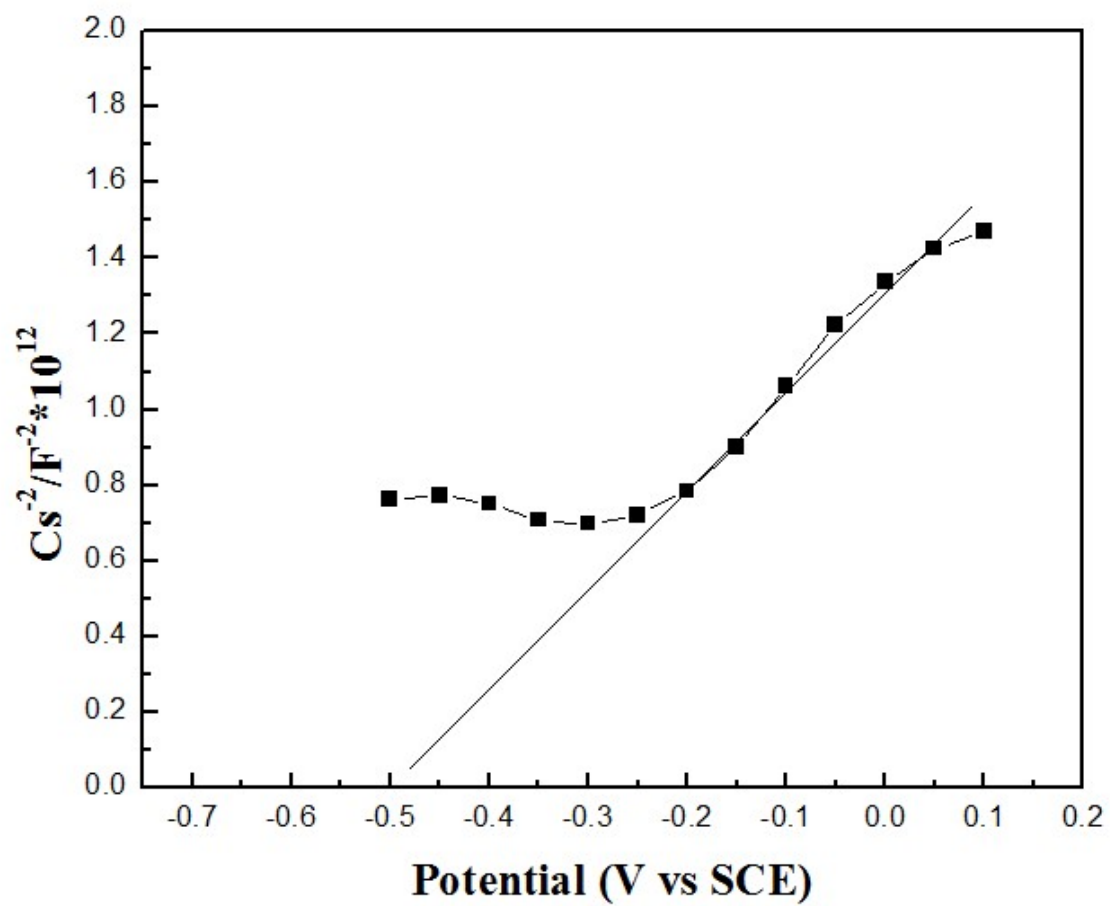

Fig. S7 typical Motte Schottky plot for 1.

Table S1 Rate constants for the decomposition of antibiotics under different conditions

| <b>Antibiotics</b>          |               |                       | <b>K</b>       | <b>R<sup>2</sup></b> |
|-----------------------------|---------------|-----------------------|----------------|----------------------|
| <b>CAP</b>                  |               |                       | <b>0.00142</b> | <b>0.97655</b>       |
| <b>NFT</b>                  |               |                       | <b>0.03245</b> | <b>0.99488</b>       |
| <b>MDZ</b>                  |               |                       | <b>0.00276</b> | <b>0.97557</b>       |
| <b>1</b>                    | <b>NFT</b>    | <b>pH</b>             | <b>K</b>       | <b>R<sup>2</sup></b> |
| <b>Concentration of NFT</b> |               |                       |                |                      |
| <b>50mg/100ml</b>           | <b>10mg/L</b> | <b>pH=5</b>           | <b>0.03245</b> | <b>0.99488</b>       |
|                             | <b>20mg/L</b> |                       | <b>0.02793</b> | <b>0.99848</b>       |
|                             | <b>30mg/L</b> |                       | <b>0.02779</b> | <b>0.97064</b>       |
| <b>Dosage of sample</b>     |               |                       |                |                      |
| <b>40mg/100ml</b>           | <b>10mg/L</b> | <b>pH=5</b>           | <b>0.03021</b> | <b>0.99749</b>       |
| <b>50mg/100ml</b>           |               |                       | <b>0.03245</b> | <b>0.99488</b>       |
| <b>60mg/100ml</b>           |               |                       | <b>0.03002</b> | <b>0.99892</b>       |
| <b>pH</b>                   |               |                       |                |                      |
| <b>50mg/100ml</b>           | <b>10mg/L</b> | <b>pH =4</b>          | <b>0.00362</b> | <b>0.97773</b>       |
|                             |               | <b>pH =5</b>          | <b>0.03245</b> | <b>0.99488</b>       |
|                             |               | <b>pH =6</b>          | <b>0.02866</b> | <b>0.99282</b>       |
| <b>Mechanism</b>            |               |                       |                |                      |
| <b>50mg/100ml</b>           | <b>10mg/L</b> | <b>H<sub>2</sub>O</b> | <b>0.03246</b> | <b>0.99488</b>       |
|                             |               | <b>AO</b>             | <b>0.02809</b> | <b>0.99773</b>       |
|                             |               | <b>BQ</b>             | <b>0.02588</b> | <b>0.98243</b>       |
|                             |               | <b>TBA</b>            | <b>0.0297</b>  | <b>0.97923</b>       |

Table S2. Crystallographic data and structure refinement details for **1**

| Parameter                                                                    | <b>1</b>                                                                      |
|------------------------------------------------------------------------------|-------------------------------------------------------------------------------|
| Formula                                                                      | C <sub>34</sub> H <sub>22</sub> N <sub>4</sub> O <sub>8</sub> Cu <sub>2</sub> |
| Formula weight                                                               | 741.63                                                                        |
| Crystal system                                                               | Monoclinic                                                                    |
| Space group                                                                  | <i>P2/n</i>                                                                   |
| Crystal Color                                                                | Green                                                                         |
| <i>a</i> , Å                                                                 | 10.9001(8)                                                                    |
| <i>b</i> , Å                                                                 | 10.8846(8)                                                                    |
| <i>c</i> , Å                                                                 | 13.6953(10)                                                                   |
| <i>α</i> , °                                                                 | 90                                                                            |
| <i>β</i> , °                                                                 | 108.552(1)                                                                    |
| <i>γ</i> , °                                                                 | 90                                                                            |
| <i>V</i> , Å <sup>3</sup>                                                    | 1540.4(2)                                                                     |
| <i>Z</i>                                                                     | 2                                                                             |
| ρ <sub>calcd</sub> , g/cm <sup>3</sup>                                       | 1.599                                                                         |
| μ, mm <sup>-1</sup>                                                          | 1.442                                                                         |
| θ Range, deg                                                                 | 1.9-27.6                                                                      |
| <i>F</i> (000)                                                               | 752                                                                           |
| Reflection Collected                                                         | 9127                                                                          |
| Independent reflections ( <i>R</i> <sub>int</sub> )                          | 0.027                                                                         |
| Reflections with <i>I</i> > 2σ( <i>I</i> )                                   | 2827                                                                          |
| <i>R</i> <sub>1</sub> , <i>wR</i> <sub>2</sub> ( <i>I</i> > 2σ( <i>I</i> ))* | 0.0322, 0.0813                                                                |
| <i>R</i> <sub>1</sub> , <i>wR</i> <sub>2</sub> (all data)**                  | 0.0435, 0.0970                                                                |

\*  $R = \sum(F_o - F_c) / \sum(F_o)$ , \*\*  $wR_2 = \{\sum[w(F_o^2 - F_c^2)^2] / \sum(F_o^2)^2\}^{1/2}$ .

Table 3 Selected bond distances (Å) and angles (deg) for **1**

| Bond         | <i>d</i> , Å | Bond         | <i>d</i> , Å |
|--------------|--------------|--------------|--------------|
| <b>1</b>     |              |              |              |
| Cu(1)-O(1)   | 1.9820(19)   | Cu(1)-O(3)   | 1.985(2)     |
| Cu(1)-N(1)   | 2.126(2)     | Cu(1)-O(2)#1 | 1.9762(19)   |
| Cu(1)-O(4)#2 | 1.992(2)     |              |              |
| Angle        | ω, deg       | Angle        | ω, deg       |

---

**1**

---

|                   |           |                     |          |
|-------------------|-----------|---------------------|----------|
| O(1)-Cu(1)-O(3)   | 89.96(8)  | O(1)-Cu(1)-N(1)     | 95.83(8) |
| O(1)-Cu(1)-O(2)#1 | 166.88(9) | O(1)-Cu(1)-O(4)#2   | 90.11(8) |
| O(3)-Cu(1)-N(1)   | 96.11(8)  | O(2)#1-Cu(1)-O(3)   | 89.10(9) |
| O(3)-Cu(1)-O(4)#2 | 166.87(8) | O(2)#1-Cu(1)-N(1)   | 97.29(8) |
| O(4)#2-Cu(1)-N(1) | 96.95(8)  | O(2)#1-Cu(1)-O(4)#2 | 87.86(8) |

---

Symmetry Codes: **For 1:** #1 = x, 1+y, z; #2 = 3/2-x, y, 3/2-z.
